# Supplementary material
Source: PubMed Central journal article supplement (PMC4648814)

Supplemental Fig. 1.

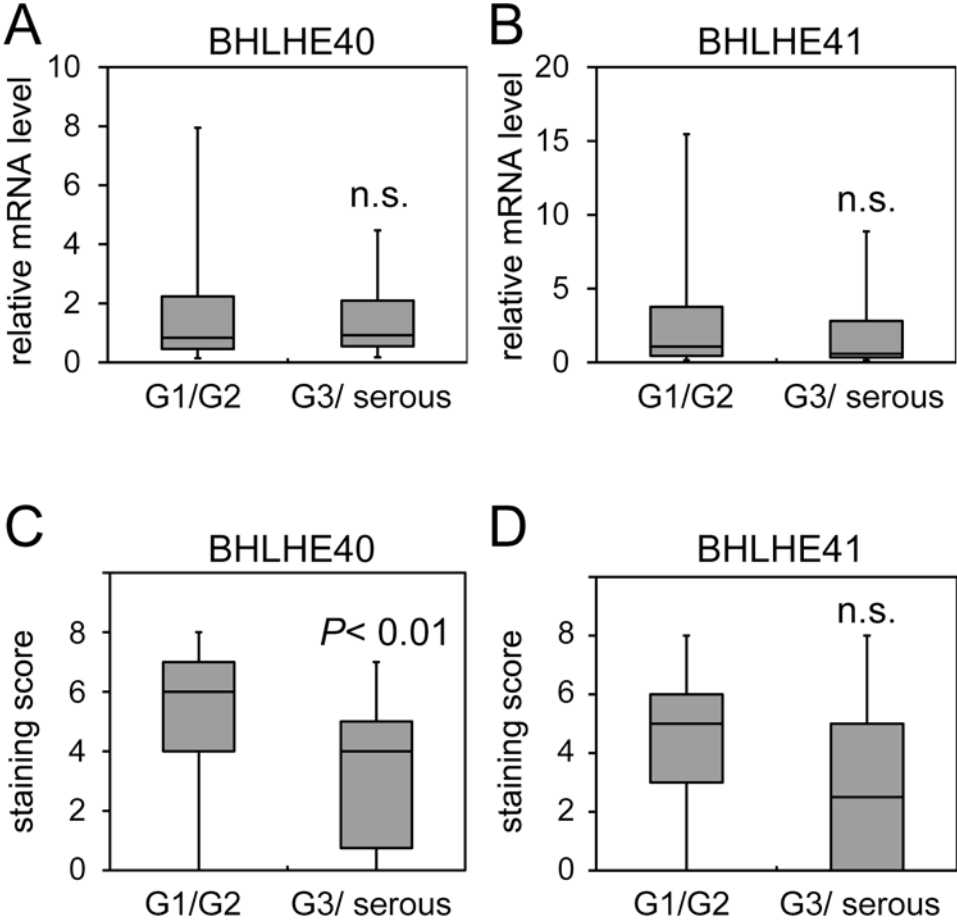

Supplement: MCB.00678-15_zmb999101027so1.pdf [file MCB.00678-15_zmb999101027so1.pdf]

# Supplemental Fig. 2.

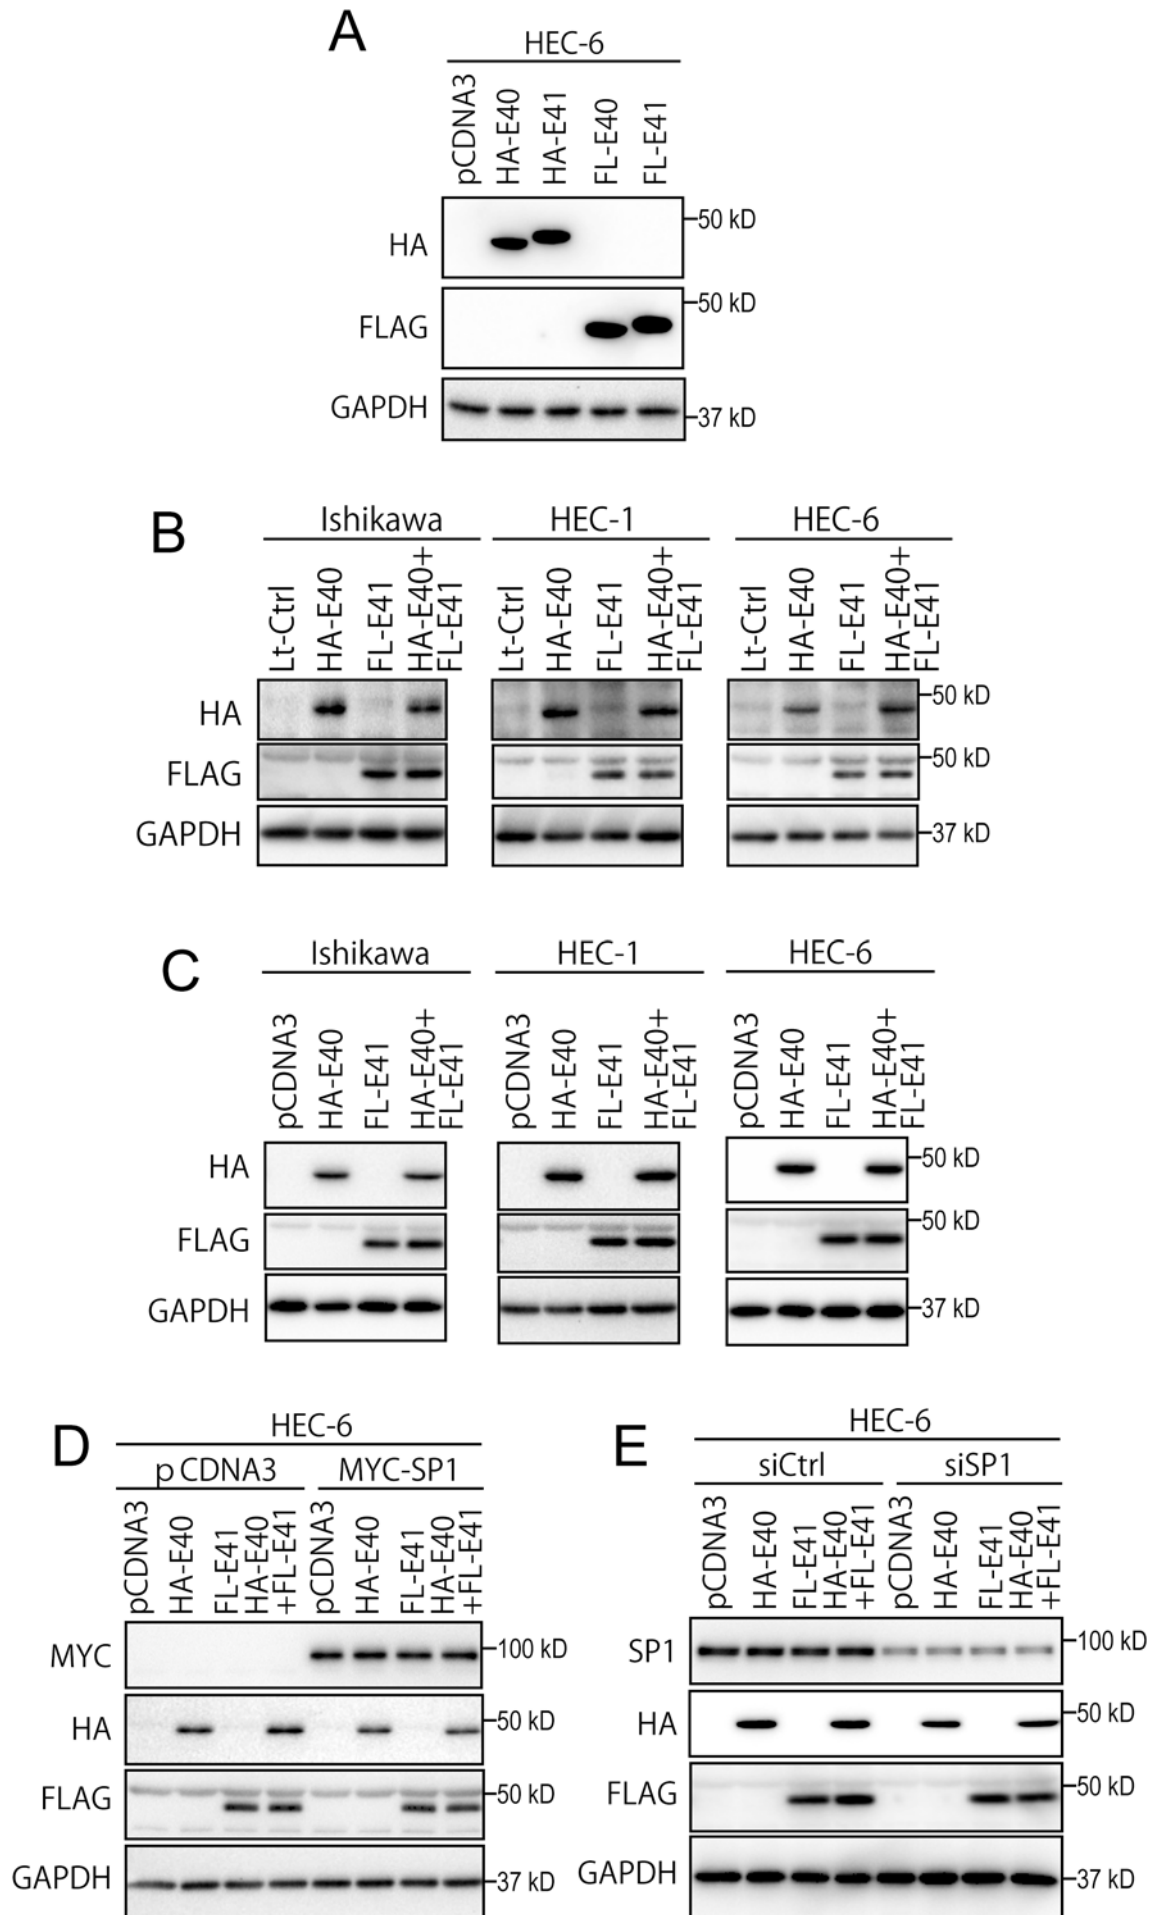

Supplement: MCB.00678-15_zmb999101027so2.pdf [file MCB.00678-15_zmb999101027so2.pdf]

# Supplemental Fig. 3.

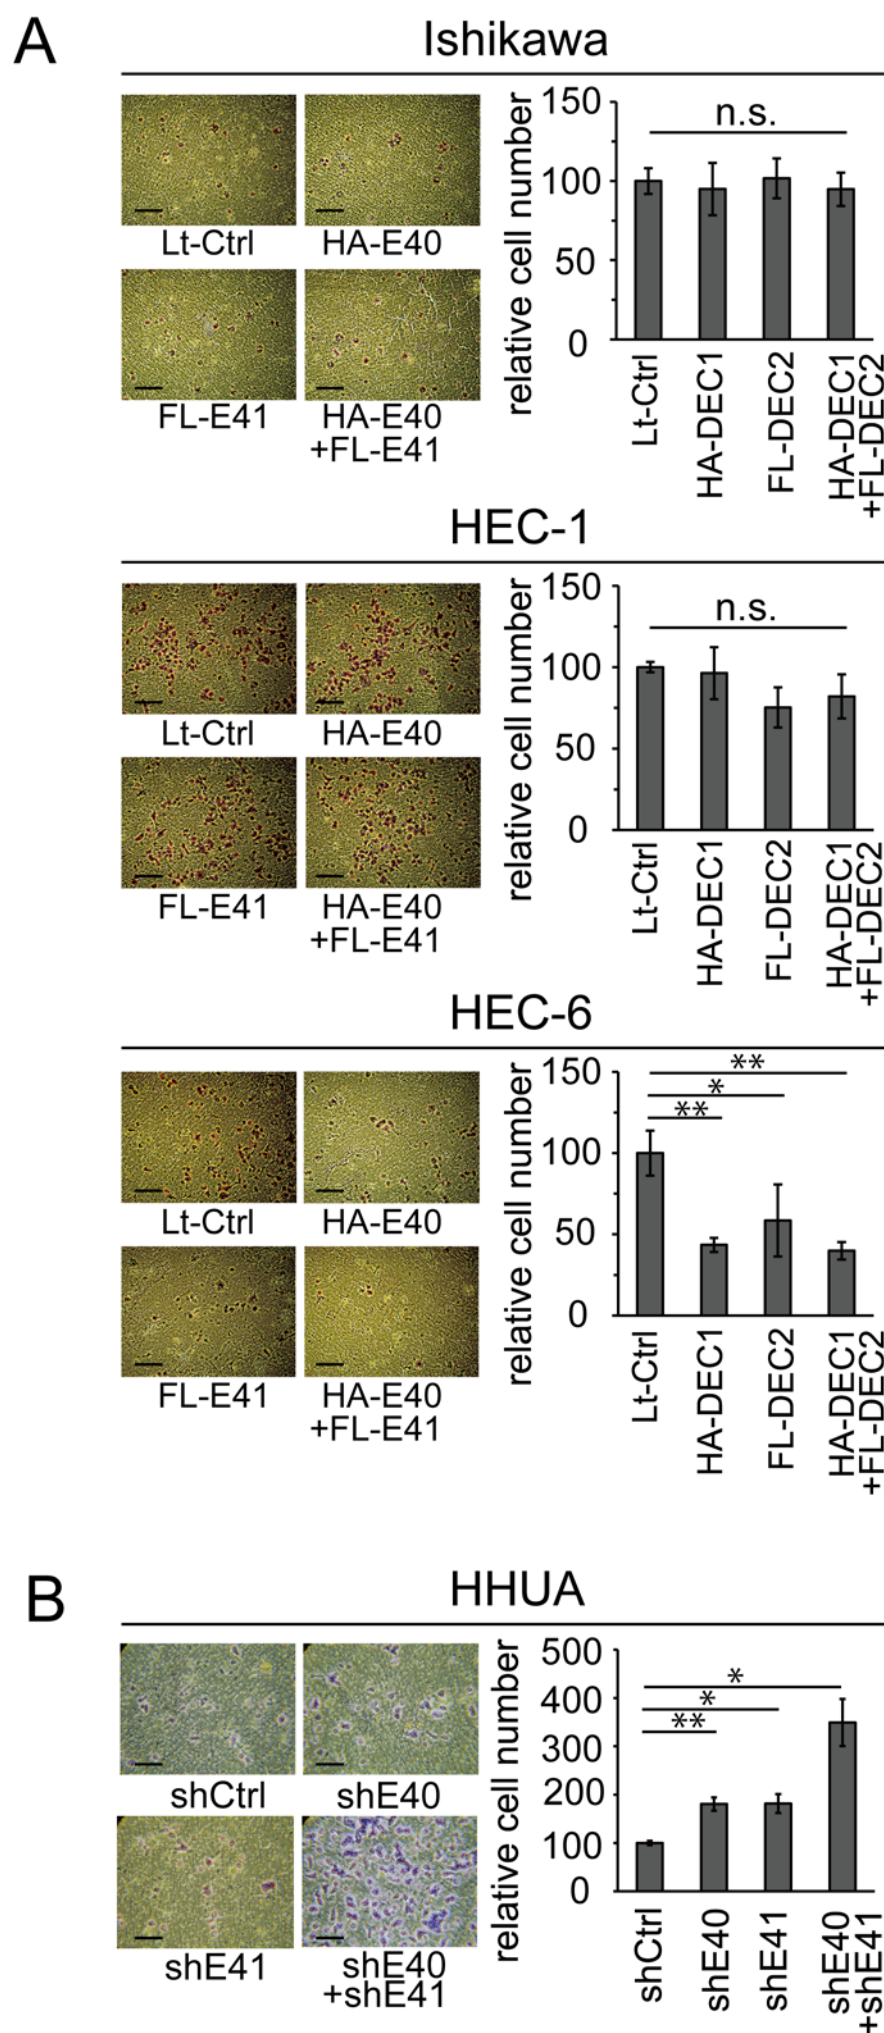

Supplement: MCB.00678-15_zmb999101027so3.pdf [file MCB.00678-15_zmb999101027so3.pdf]

Supplemental Fig. 4.

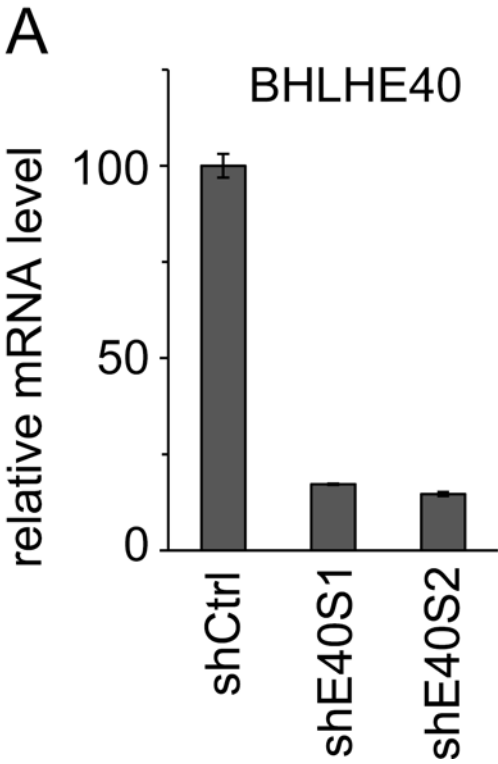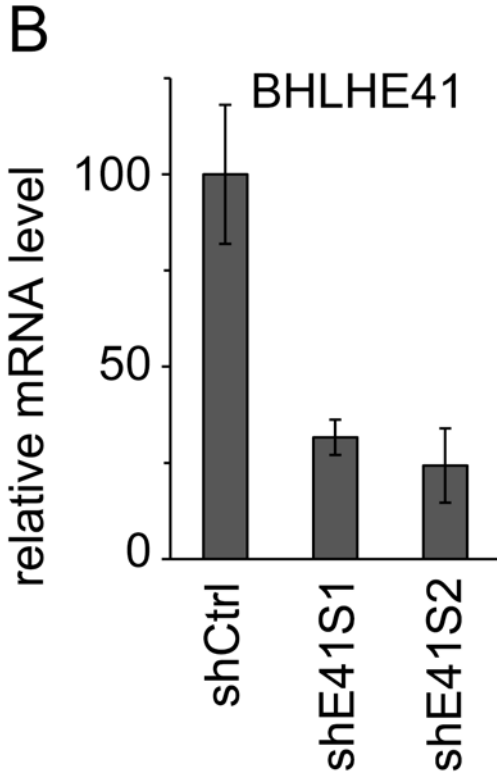

Supplement: MCB.00678-15_zmb999101027so4.pdf [file MCB.00678-15_zmb999101027so4.pdf]

Supplemental Fig. 5.

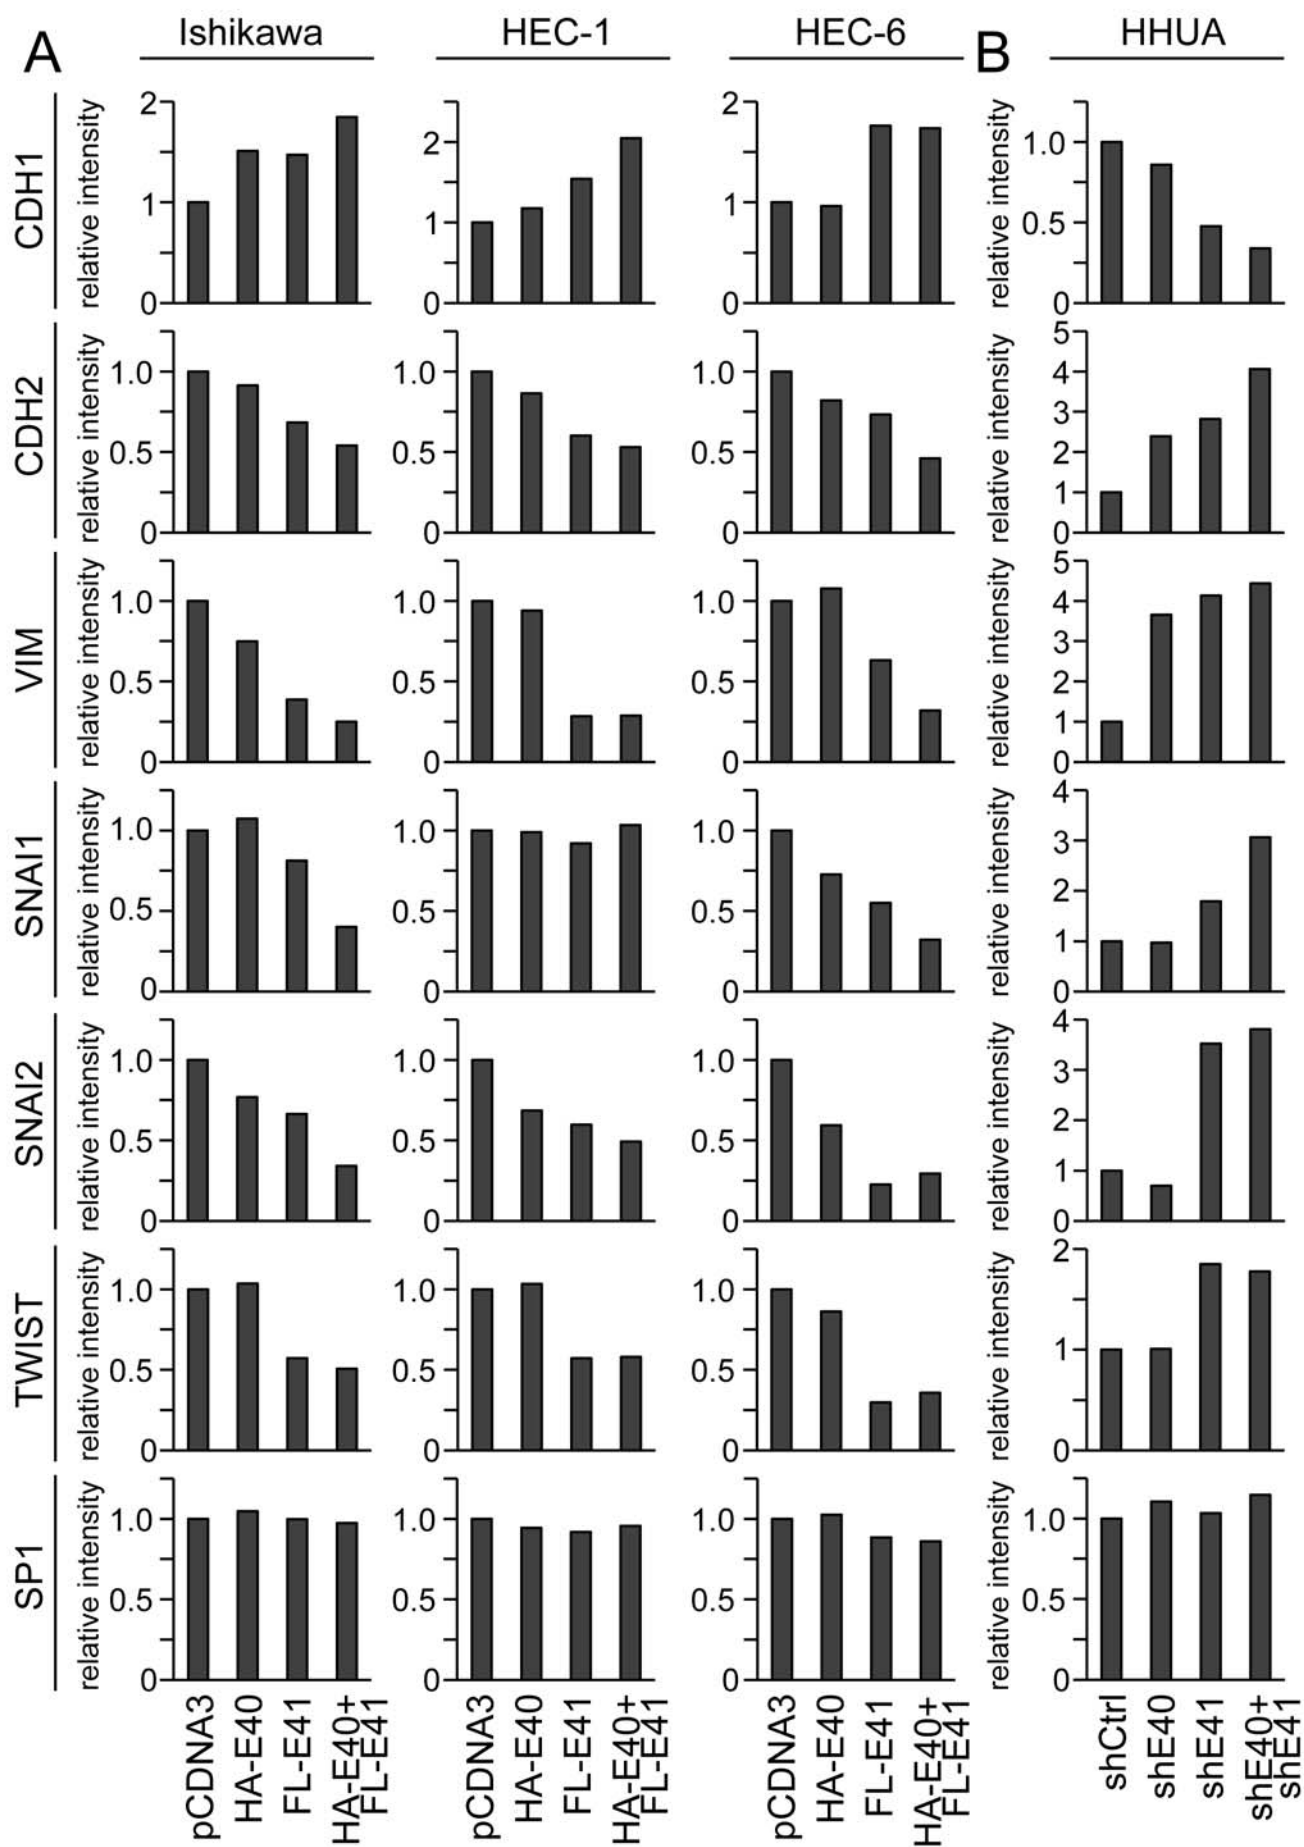

Supplement: MCB.00678-15_zmb999101027so5.pdf [file MCB.00678-15_zmb999101027so5.pdf]

# Supplemental Fig. 6.

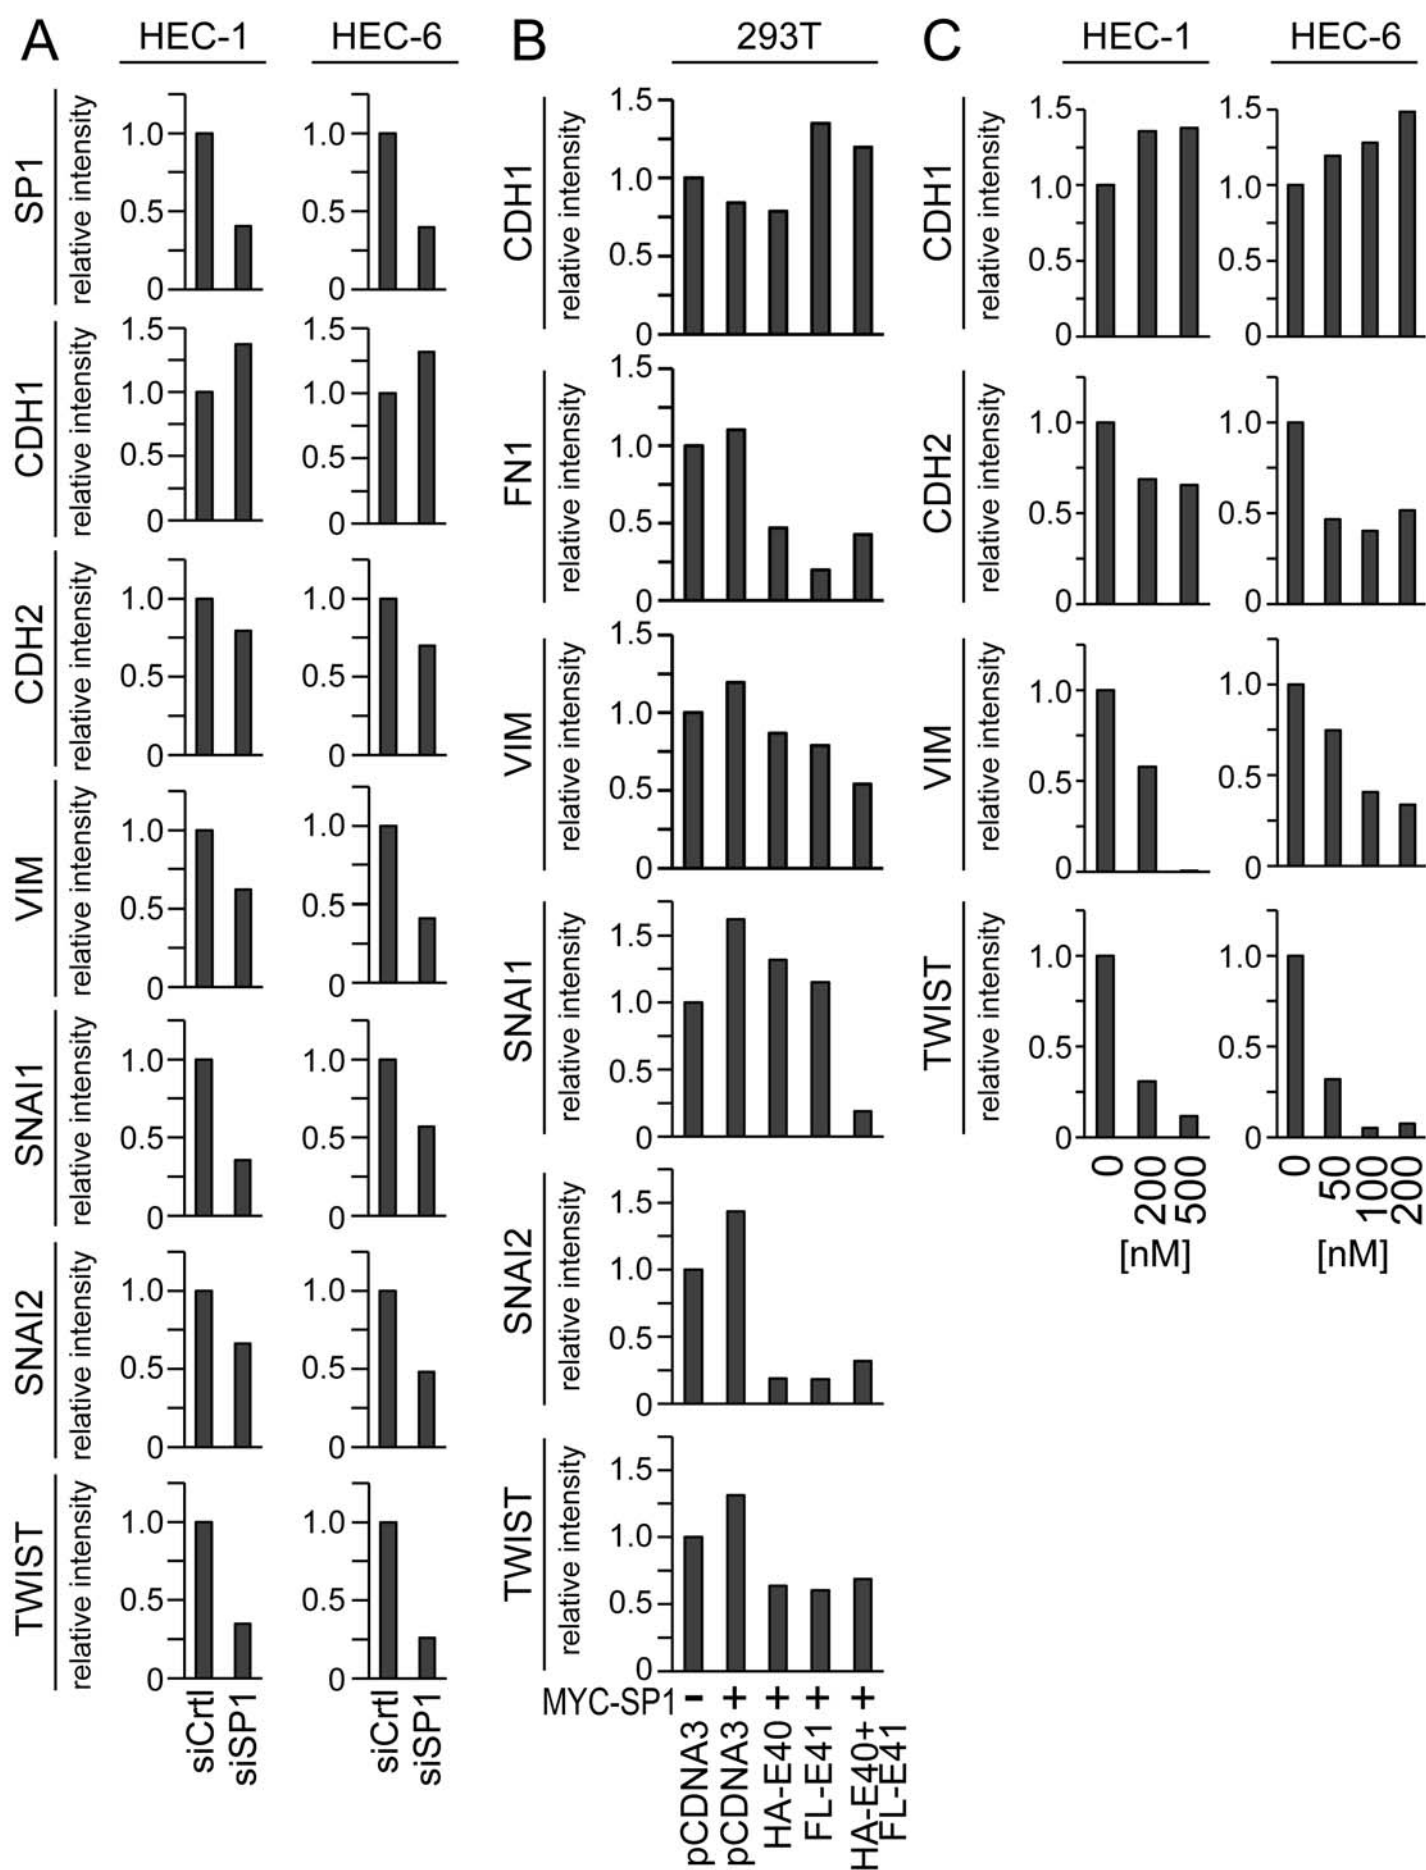

Supplement: MCB.00678-15_zmb999101027so6.pdf [file MCB.00678-15_zmb999101027so6.pdf]

# Supplemental Fig. 7.

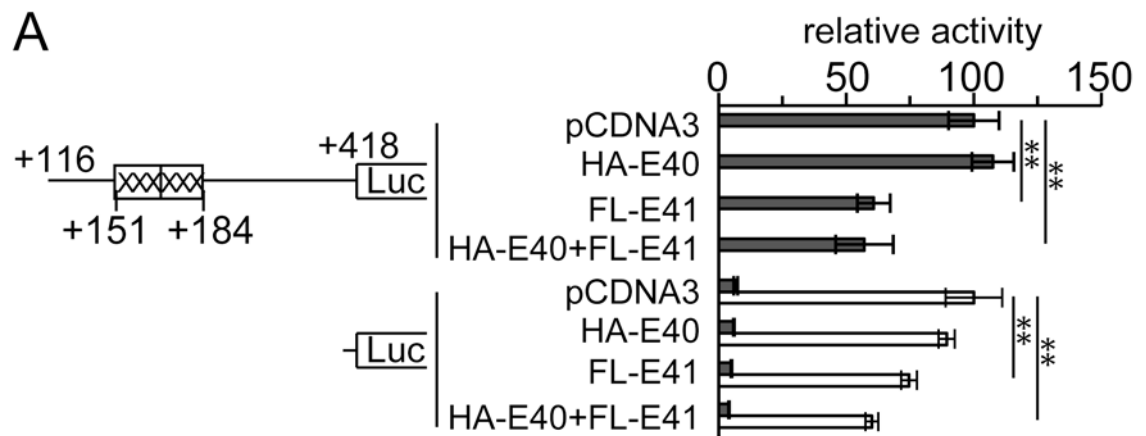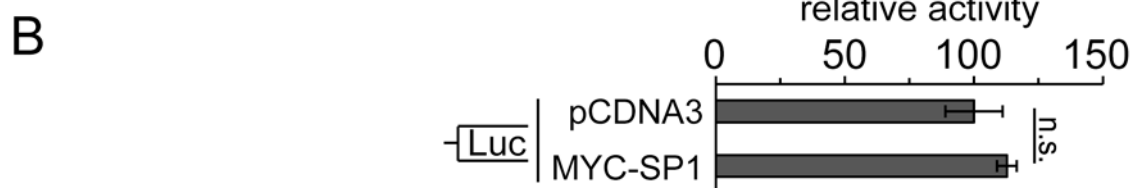

Supplement: MCB.00678-15_zmb999101027so7.pdf [file MCB.00678-15_zmb999101027so7.pdf]
